# Supplementary material
Source: PubMed Central journal article supplement (PMC2756076)
Supplement: NIHMS103373-supplement-1_si_001.pdf [file NIHMS103373-supplement-1_si_001.pdf]

## Supporting Information

### Human Manganese Superoxide Dismutase Tyrosine 34

#### Contribution to Structure and Catalysis

J. Jefferson P. Perry,<sup>†,‡</sup> Amy S. Hearn<sup>§</sup>, Diane E. Cabelli,<sup>‡</sup> Harry S. Nick,<sup>§</sup>

John A. Tainer,<sup>†,‡</sup> and David N. Silverman<sup>\*</sup>

<sup>†</sup>Department of Molecular Biology, The Scripps Research Institute, La Jolla, CA 92037

<sup>‡</sup>School of Biotechnology, Amrita University, Kollam, Kerala 690525, India

<sup>‡</sup>Life Sciences Division, Department of Molecular Biology, Lawrence Berkeley National Laboratory, Berkeley, CA, 94720

<sup>‡</sup>Department of Chemistry, Brookhaven National Laboratory, Upton, New York 11973

<sup>§</sup>Department of Neuroscience, University of Florida, Gainesville, FL 32510

<sup>\*</sup>Department of Pharmacology, University of Florida, Gainesville, FL 32610

**Contents:** Three pages total containing a figure of the rate of change of absorbance upon introduction of superoxide to Y34N and Y34F human MnSOD, and a figure of extinction coefficients at different wavelengths for Y34A human MnSOD.

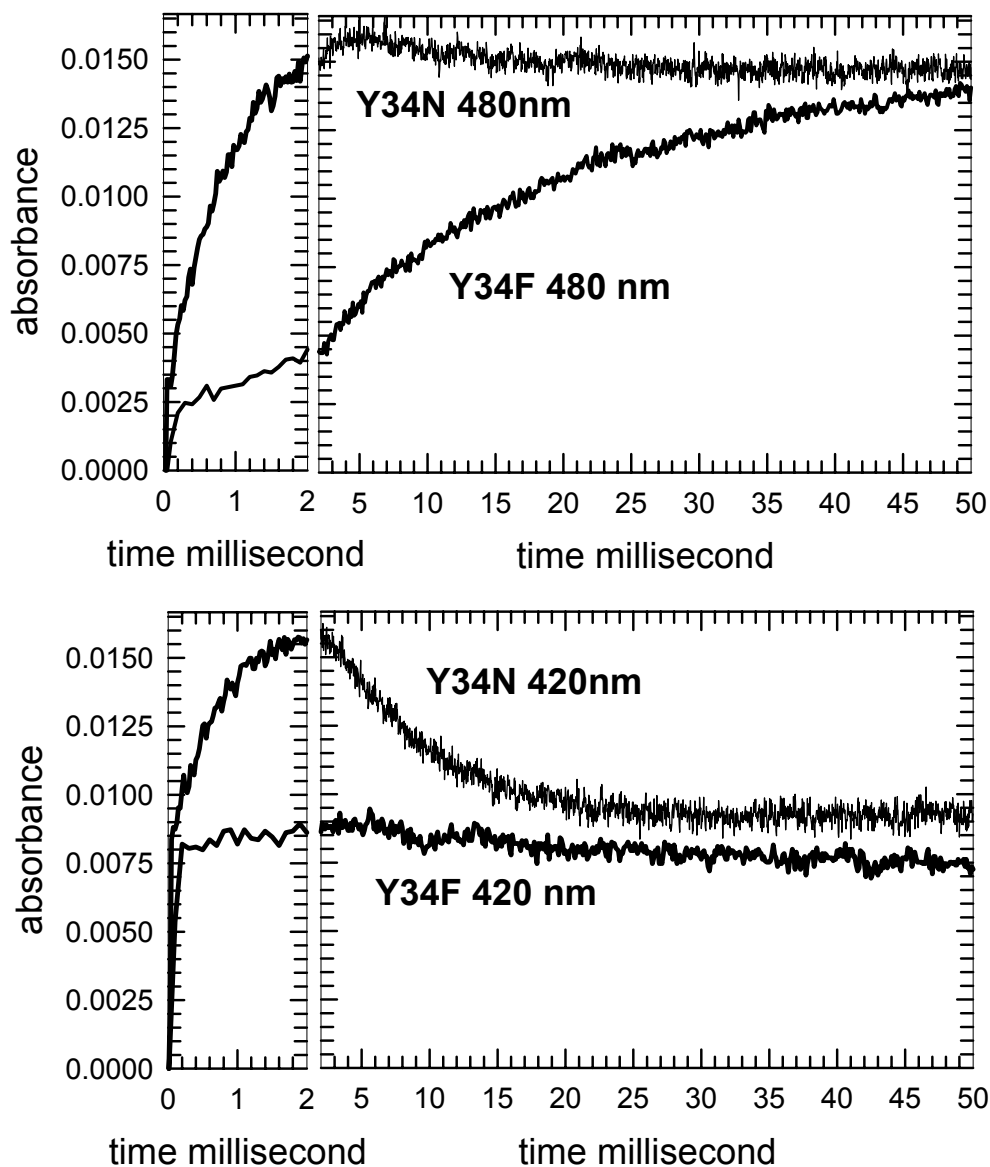

**Figure S1.** The increase in absorbance (*top*) at 480 nm of 182  $\mu\text{M}$  Y34N MnSOD and 170  $\mu\text{M}$  Y34F MnSOD and (*bottom*) at 420 nm after pulse radiolysis generated superoxide. Solutions contained 30 mM formate, 50  $\mu\text{M}$  EDTA, and 2 mM Mops at pH 7.4 for Y34F and pH 7.1 for Y34N. The enzymes had been reduced prior to the experiment with  $\text{H}_2\text{O}_2$ .

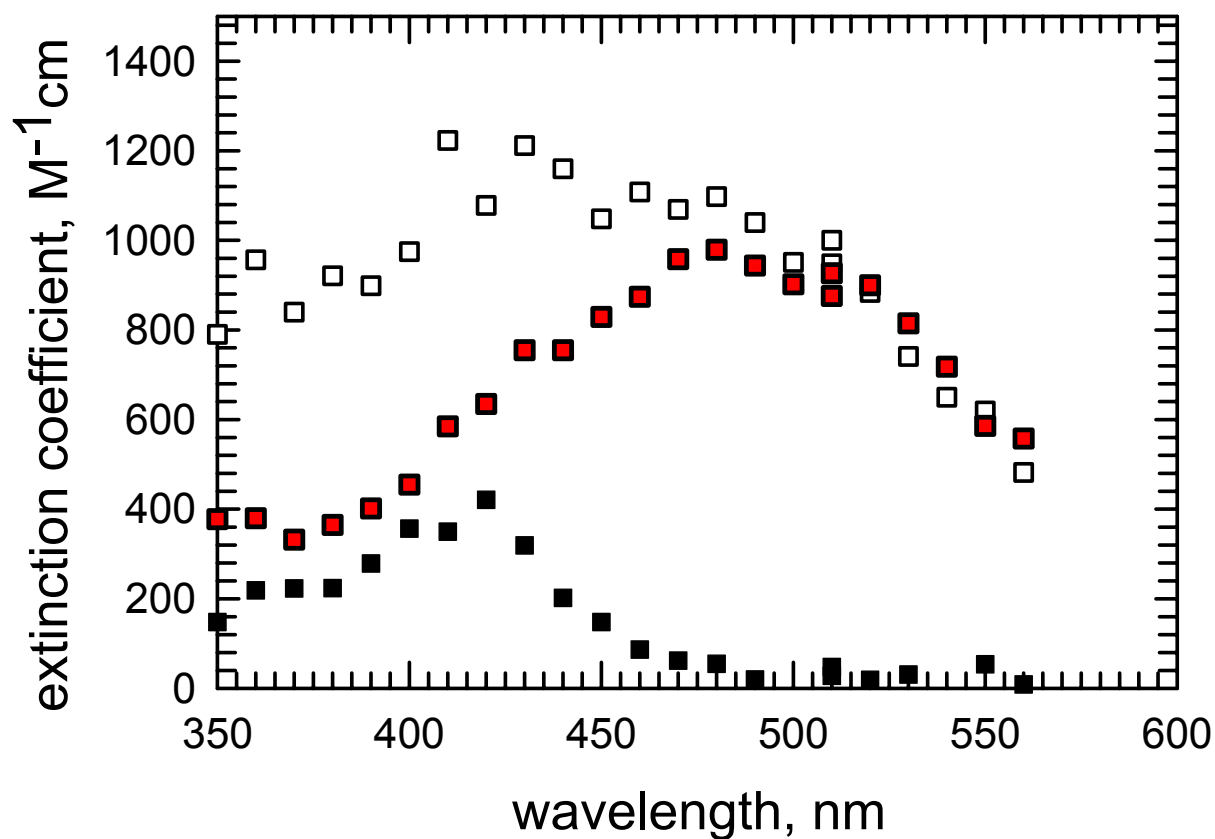

**Figure S2.** Molar extinction coefficient ( $M^{-1}cm^{-1}$ ) observed after pulse radiolysis of a solution of Y34A MnSOD ( $120 \mu M$ ) pre-reduced with  $H_2O_2$ . (Red squares) spectrum of  $Mn^{3+}(OH)SOD$  obtained by extrapolating to long times as in Figure 2A; (black squares) spectrum of the product-inhibited complex obtained by extrapolating the initial increase ( $t \neq 0.2$  ms) as in Figure 2A; (open squares) spectrum of a newly-detected intermediate obtained by extrapolating the second kinetic process at times near 2 ms as in Figure 2B. Conditions were as described in Figure 2.
